# Supplementary material for: Introducing Semi-Interpenetrating Networks of Chitosan and Ammonium-Quaternary Polymers for the Effective Removal of Waterborne Pathogens from Wastewaters
Source: MDPI journal article supplement (doi:10.3390/polym15051091), 2023-02-22
Supplement: s1 [file s1]

**Introducing semi-interpenetrating networks of chitosan and ammonium-quaternary polymers for the effective removal of waterborne pathogens from wastewaters**

Iulia E. Neblea, Anita-Laura Chiriac, Anamaria Zaharia, Andrei Sarbu, Mircea Teodorescu, Andreea Miron, Lisa Paruch, Adam M. Paruch, Andreea G. Olaru, Tanta-Verona Iordache

**Table S1.** The main characteristic bands of semi-IPN hydrogels based on monomer VBTAC, crosslinker MBA and chitosan, and of the three types of chitosan (CC, CCH and SHC)

| Sample               | $\nu_{OH}$ | $\nu_{CH}, \nu_{CH_2}$ | $\nu_{C=O}$ | $\nu_{NH}$ | $\nu_{N+(CH_3)_3}$ |
|----------------------|------------|------------------------|-------------|------------|--------------------|
| CC                   | 3410       | 2886                   | 1657        | 1562       | -                  |
| CCH                  | 3353       | 2869                   | 1646        | 1568       | -                  |
| SHC                  | 3317       | 2891                   | 1659        | 1566       | -                  |
| poly(VBTAC)          | 3412       | 3028, 2928             | 1645        | -          | 1482               |
| CC-IPN <sub>2</sub>  | 3412       | 3020, 2928             | 1653        | 1551       | 1480               |
| CC-IPN <sub>3</sub>  | 3407       | 3020, 2920             | 1660        | 1547       | 1484               |
| CC-IPN <sub>4</sub>  | 3445       | 3020, 2945             | 1654        | 1564       | 1489               |
| CCH-IPN <sub>2</sub> | 3413       | 3024, 2924             | 1651        | 1552       | 1483               |
| CCH-IPN <sub>3</sub> | 3407       | 3022, 2924             | 1655        | 1554       | 1483               |
| CCH-IPN <sub>4</sub> | 3385       | 3023, 2921             | 1647        | 1563       | 1483               |
| SHC-IPN <sub>2</sub> | 3427       | 3022, 2924             | 1655        | 1560       | 1487               |
| SHC-IPN <sub>3</sub> | 3422       | 3028, 2922             | 1650        | 1560       | 1487               |
| SHC-IPN <sub>4</sub> | 3407       | 3022, 2928             | 1628        | 1569       | 1482               |

**Table S2.** Specific decomposition temperatures and mass loss of the chitosan-based hydrogels and of the three types of chitosan (CC, CCH and SHC)

| Sample               | T <sub>d1</sub> , °C | T <sub>d2</sub> , °C | T <sub>d3</sub> , °C | T <sub>d4</sub> , °C | Mass loss, % |
|----------------------|----------------------|----------------------|----------------------|----------------------|--------------|
| CC-IPN <sub>2</sub>  | 87                   | 265                  | 317                  | 429                  | 77.98        |
| CC-IPN <sub>3</sub>  | 89                   | 277                  | 307                  | 430                  | 78.03        |
| CC-IPN <sub>4</sub>  | 92                   | 272                  | 300                  | 409                  | 76.85        |
| CC                   | -                    | 287                  | -                    | -                    | 69.35        |
| CCH-IPN <sub>2</sub> | 90                   | 266                  | 316                  | 428                  | 75.61        |
| CCH-IPN <sub>3</sub> | 92                   | 267                  | 305                  | 427                  | 79.89        |
| CCH-IPN <sub>4</sub> | 96                   | 278                  | -                    | 406                  | 78.58        |
| CCH                  | -                    | 288                  | -                    | -                    | 68.49        |
| SHC                  | 88                   | -                    | 305                  | -                    | 55.02        |
| SHC-IPN <sub>2</sub> | 89                   | 264                  | 321                  | 429                  | 80.61        |
| SHC-IPN <sub>3</sub> | 94                   | 267                  | 304                  | 427                  | 80.51        |
| SHC-IPN <sub>4</sub> | 96                   | 276                  | 301                  | 408/426              | 80.57        |
|                      |                      | (hump)               |                      | (hump)               |              |
| polyVBTAC            | 90                   | 295                  | -                    | 406                  | 84.25        |
